# Supplementary material for: The Expression of Functional Vpx during Pathogenic SIVmac Infections of Rhesus Macaques Suppresses SAMHD1 in CD4+ Memory T Cells
Source: PLOS journal article supplement (doi:10.1371/journal.ppat.1004928), 2015-05-21
Supplement: S3 (10.1371/journal.ppat.1004928.s003) [file journal.ppat.1004928.s003]

**A** SIVmac239 Vpx

WT MSDPRERIPP GNSGEETIGE AFEWLNRNTE EINREAVNHL PRELIFQVWQ RSWEYWHDEQ GMSPSYVKYR YLCLIQKALF MHCKKGCRCL GEGHGAGGWR PGPPPPPPPG LA 76  
 Q76A MSDPRERIPP GNSGEETIGE AFEWLNRNTE EINREAVNHL PRELIFQVWQ RSWEYWHDEQ GMSPSYVKYR YLCLIAKALF MHCKKGCRCL GEGHGAGGWR PGPPPPPPPG LA  
 K42 swarm

**B** SIVmac316 Vpx

[illegible]
